# Supplementary material for: Enhancing the catalytic conversion of polysulfides utilizing a covalent organic framework–carbon nanotube interlayer
Source: Royal Society of Chemistry journal article supplement (doi:10.1039/d5ta03984c), 2025-01-01
Supplement: d5ta03984c1.pdf [file d5ta03984c1.pdf]

## **Enhancing the catalytic conversion of polysulfides utilizing covalent organic framework-carbon nanotube interlayer**

Bowen Sun<sup>[a,b]</sup>, Feng Huo<sup>[b,c,d,e]\*</sup>, Chongchong Zhao<sup>[b,c]</sup>, Jinhai He<sup>[a]</sup>, Jiaojiao Xue<sup>[a]</sup>, Zhiqiang Sun<sup>[a]</sup>, Jiayao Wu<sup>[a]</sup>, Xuntao Wang<sup>[a]</sup>, Jiali Wang<sup>[a]</sup>, Ruizheng Zhao<sup>[f]\*</sup>, Zixu Sun<sup>[a]\*</sup>

<sup>a</sup>Key Lab for Special Functional Materials of Ministry of Education, School of Nanoscience and Materials Engineering, Henan University, Kaifeng 475004, China

<sup>b</sup>Henan Key Laboratory of Energy Storage Materials and Processes, Zhengzhou Institute of Emerging Industrial Technology, Zhengzhou 450000, China

<sup>c</sup>Longzihu New Energy Laboratory, Zhengzhou 450000, China

<sup>d</sup>Beijing Key Laboratory of Solid State Battery and Energy Storage Process, CAS Key Laboratory of Green Process and Engineering, State Key Laboratory of Mesoscience and Engineering, Institute of Process Engineering, Chinese Academy of Sciences, Beijing 100190, China

<sup>e</sup>State Key Laboratory of Green Chemical Synthesis and Conversion, Henan University, Zhengzhou 450000 China

<sup>f</sup>Interdisciplinary Research Center for Sustainable Energy Science and Engineering (IRC4SE2), Engineering Research Center of Advanced Functional Material Manufacturing of Ministry of Education, School of Chemical Engineering, Zhengzhou University, Zhengzhou, 450001, China

Email: [sunzixu@henu.edu.cn](mailto:sunzixu@henu.edu.cn) (Zixu Sun), [rzzhao@zzu.edu.cn](mailto:rzzhao@zzu.edu.cn) (Ruizheng Zhao), [huofeng@ipe.ac.cn](mailto:huofeng@ipe.ac.cn) (Feng Huo).



## 1 **Experimental section**

### 2 **Fabrication of Modified Separators:**

3 The CTF and CTF-CNT modified separators were prepared via vacuum-assisted  
4 filtration. Typically, 50 mg of the as-synthesized CTF or CTF-CNT powder was  
5 dispersed in 50 mL of N-methyl-2-pyrrolidone (NMP, 1 mol L<sup>-1</sup>) containing  
6 approximately 5.5 mg of polyvinylidene fluoride (PVDF) as a binder. The mixture was  
7 stirred magnetically until homogeneous and further sonicated for several minutes to  
8 ensure uniform dispersion. Subsequently, ~5 mL of the dispersion was vacuum-filtered  
9 onto a commercial polypropylene (PP) membrane with a diameter of 4.8 cm. The coated  
10 separator was then dried at room temperature for 12 h. The resulting coating layer had  
11 a thickness of 5–7 μm, and the mass loading of the active material was ~0.3 mg cm<sup>-2</sup>.

12 The vacuum filtration process resulted in a compact and uniform coating layer on the  
13 PP membrane, as shown in **Figure S10**. The prepared separators were designated as  
14 CTF and CTF-CNT, with the latter further labeled according to the CNT content: CTF-  
15 CNT-5, CTF-CNT-10, and CTF-CNT-20.

### 16 **Preparation of Electrolyte**

#### 17 **Standard Electrolyte for Li–S Batteries:**

18 The electrolyte typically consists of 1 M LiTFSI and 1 wt% LiNO<sub>3</sub> dissolved in a  
19 DME/DOL (1:1 by volume) solvent mixture.

#### 20 **Li<sub>2</sub>S<sub>6</sub> Electrolyte:**

21 To prepare a 0.2 M Li<sub>2</sub>S<sub>6</sub> solution, elemental sulfur (320.6 mg, 0.01 mol) and Li<sub>2</sub>S  
22 (91.8 mg, 0.002 mol) were weighed and transferred into a glass vial inside an argon-  
23 filled glovebox. Then, 10 mL of a DOL:DME solvent mixture (1:1 by volume) was  
24 added. The mixture was heated and stirred at 60 °C for 24 hours until a clear yellow  
25 solution was obtained. This solution was used for adsorption experiments.

#### 26 **Li<sub>2</sub>S<sub>8</sub> Electrolyte Preparation:**



### 1 **0.1 M Li<sub>2</sub>S<sub>8</sub> Electrolyte:**

2 A 0.1 M Li<sub>2</sub>S<sub>8</sub> electrolyte was prepared in an argon-filled glovebox. Elemental sulfur  
3 (2244.6 mg, 0.07 mol) and Li<sub>2</sub>S (459.5 mg, 0.01 mol) were weighed and placed into a  
4 glass vial. Then, 100 mL of a DOL:DME (1:1 by volume) solvent mixture was added.  
5 The mixture was heated and stirred at 60 °C for 24 hours to yield a yellow solution,  
6 which was used for adsorption experiments.

### 7 **0.2 M Li<sub>2</sub>S<sub>8</sub> Electrolyte:**

8 To prepare a 0.2 M Li<sub>2</sub>S<sub>8</sub> electrolyte under the same solvent conditions, the molar  
9 amounts of sulfur and Li<sub>2</sub>S were doubled accordingly.

### 10 **Cathode Preparation:**

11 The main framework of the cathode material was based on porous-walled carbon  
12 nanotubes (MWCNTs). Multi-walled carbon nanotubes (MWCNTs) and elemental  
13 sulfur were mixed in a mass ratio of 3:7 by ball milling for 1 hour. The mixture was  
14 then transferred into a reaction kettle, and the atmosphere was exchanged under an  
15 argon-filled glovebox (O<sub>2</sub> and H<sub>2</sub>O levels < 0.01 ppm). The sealed vessel was heated at  
16 155 °C for 12 hours to obtain the sulfur–carbon composite material (CNT/S). The sulfur  
17 content in the composite was determined to be 69.7% by thermogravimetric analysis  
18 (TGA), as shown in **Figure S11**.

19 The CNT/S composite was then mixed with a conductive agent (Super P) and  
20 polyvinylidene fluoride (PVDF) in a mass ratio of 8:1:1. A certain amount of N-methyl-  
21 2-pyrrolidone (NMP) was added to the mixture in a ball mill jar for 1 hour of grinding.  
22 The PVDF was pre-dissolved in NMP to form a 2 wt% solution (mass ratio 2:98). After  
23 grinding, a viscous and homogeneous slurry was obtained, which was uniformly coated  
24 onto carbon-coated aluminum foil using a doctor blade. The coated foil was dried in a  
25 vacuum oven at 60 °C for 12 hours. Finally, round cathode disks with a diameter of 12  
26 mm were punched out, yielding CNT/S composite sulfur cathodes with a sulfur loading  
27 of 0.8–1.2 mg cm<sup>-2</sup>.



## 1 **Preparation of COF electrode sheets:**

2 A mixture comprising CTF-CNT, CTF, CNT, Super-P, and PVDF was combined  
3 with a specific quantity of NMP in a ratio of 8:1:1. This mixture was subjected to  
4 grinding in a ball mill jar for one hour, resulting in the formation of a viscous and  
5 homogeneous slurry. Subsequently, the slurry was uniformly applied onto carbon-  
6 coated aluminum foil using a scraper. The coated foil was then dried at 60 °C in a  
7 vacuum drying oven for 12 hours. After the drying process, the material was cut into  
8 small discs with a diameter of 12 mm.

## 9 **Li<sub>2</sub>S Nucleation Experiment**

10 The lithium sulfide nucleation experiment utilized various COF materials coated  
11 onto a carbon substrate to function as electrodes. Specifically, a mixture of CTF-CNT  
12 or CTF, Super-P, and polyvinylidene fluoride (PVDF) was homogenized in N-methyl-  
13 2-pyrrolidone (NMP) at a mass ratio of 7:2:1. The resultant slurry was subsequently  
14 cast onto carbon paper. A lithium foil was employed as the counter electrode, with a  
15 Celgard 2400 separator placed between the electrodes. The electrolyte comprised a 0.2  
16 M solution of Li<sub>2</sub>S<sub>8</sub> dissolved in the electrolyte medium. The battery underwent an  
17 initial galvanostatic discharge at a current of 0.112 mA to a voltage of 2.06 V, followed  
18 by a potentiostatic discharge at 2.05 V for 10,000 seconds to facilitate the nucleation  
19 and growth of Li<sub>2</sub>S.

## 20 **Battery Assembly:**

21 To assemble the battery, a lithium metal foil was first placed onto the negative case.  
22 Then, 25 µL of electrolyte was added using a micropipette. A separator was carefully  
23 placed on top of the lithium metal, ensuring full coverage and central alignment with  
24 the lithium disk. An additional 25 µL of electrolyte was then dropped onto the separator.  
25 The sulfur cathode was placed on top of the separator, aligned centrally.

26 Subsequently, a stainless steel spacer, a spring, and the positive case were  
27 sequentially assembled. The entire cell was then pressed using an automatic crimping



1 machine at a pressure of 450 kg. The assembled battery was allowed to rest until the  
2 open-circuit voltage stabilized before electrochemical testing was carried out.

3 The spring ensures tight contact among all internal components, while the stainless  
4 steel spacer increases the overall thickness and contributes to better compression of the  
5 cell.

## 6 **Electrochemical measurements.**

7 Electrochemical characterization was performed using standard testing protocols.  
8 Galvanostatic charge/discharge measurements were carried out on the LAND 2001A  
9 test system at 25°C, with current densities normalized to sulfur mass (1C = 1675 mA  
10 g<sup>-1</sup>). The standard voltage window was set at 1.7-2.8 V (vs Li/Li<sup>+</sup>), while high-loading  
11 electrodes were tested between 1.6-2.7 V. Electrochemical workstation (Metrohm  
12 M204) measurements included: (1) cyclic voltammetry at 0.1-0.4 mV s<sup>-1</sup> scan rates  
13 (1.7-2.8 V range), (2) electrochemical impedance spectroscopy (100 kHz-0.1 Hz, 10  
14 mV amplitude), and (3) galvanostatic intermittent titration with 0.1C current pulses (10  
15 min on/20 min off intervals).

## 16 **In situ time-resolved Raman measurements**

17 The in-situ time-domain Raman measurement of Li<sub>2</sub>S<sub>8</sub> solution is conducted using a  
18 0.2M Li<sub>2</sub>S<sub>8</sub> electrolyte. The materials' electrode is prepared by mixing CTF-CNT and  
19 CTF, carbon black, and PVDF in a mass ratio of 8:1:1 in NMP, and then the slurry is  
20 coated on an aluminum mesh. PP is used as a separator. The CTF-CNT and CTF  
21 electrodes serve as the cathode. The electrolyte consists of 0.2M Li<sub>2</sub>S<sub>8</sub> dissolved in  
22 LiTFSI and 1wt% LiNO<sub>3</sub> in DOL/DME (1:1). The positive electrode shell has a small  
23 hole (diameter: 5 millimeters) and is filled with a quartz piece. After assembly, 50  
24 microliters of Li<sub>2</sub>S<sub>8</sub> solution is slowly added through the small hole onto the COF  
25 electrode. Finally, a quartz piece is placed on the positive electrode box to cover the  
26 small hole. The incident beam is a focused laser beam with a wavelength of 532  
27 nanometers.



## 1 Ionic Conductivity Measurements

2 The ionic conductivity of separators and electrolytes was determined using  
3 electrochemical impedance spectroscopy (EIS) in a stainless steel symmetric cell  
4 configuration. Measurements were conducted over a frequency range of 0.1 Hz to 100  
5 kHz. The ionic conductivity ( $\sigma$ ) was calculated according to the following equation:

$$6 \quad \sigma = L / (R_b \times A)$$

7 where L is the thickness of the separator,  $R_b$  is the bulk resistance obtained from the  
8 EIS Nyquist plot, and A is the contact area between the separator and electrodes.

## 9 Lithium-Ion Transference Number Measurements

10 The lithium-ion transference number ( $t_{Li^+}$ ) was determined using  
11 chronoamperometry in a Li||Li symmetric cell configuration. The value was calculated  
12 according to the Bruce-Vincent equation:

$$13 \quad t_{Li^+} = I_s (\Delta V - I_0 R_0) / I_0 (\Delta V - I_s R_s)$$

14  $I_s$  = steady-state current

15  $I_0$  = initial current

16  $\Delta V$  = applied potential difference

17  $R_0$  = initial interfacial resistance

18  $R_s$  = steady-state interfacial resistance

## 19 Lithium-Ion Diffusion Coefficient Determination

20 The lithium-ion diffusion coefficient ( $D_{Li^+}$ ) was evaluated through cyclic  
21 voltammetry (CV) measurements conducted at multiple scan rates (0.1-0.4 mV s<sup>-1</sup>).

22 The diffusion coefficient was quantitatively determined using the Randles-Ševčík  
23 equation:

$$24 \quad I_{peak} = 2.69 \times 10^5 \times n^{1.5} \times A \times D_{Li^+}^{0.5} \times C_{Li^+} \times V^{0.5}$$



- 1  $I_p$  = peak current (A)
- 2  $n$  = number of electrons transferred
- 3  $A$  = electrode area ( $\text{cm}^2$ )
- 4  $D_{\text{Li}^+}$  = lithium-ion diffusion coefficient ( $\text{cm}^2 \text{s}^{-1}$ )
- 5  $C$  = bulk concentration ( $\text{mol cm}^{-3}$ )
- 6  $v$  = scan rate ( $\text{V s}^{-1}$ )
- 7
- 8
- 9
- 10
- 11
- 12
- 13
- 14
- 15
- 16
- 17
- 18
- 19
- 20
- 21
- 22



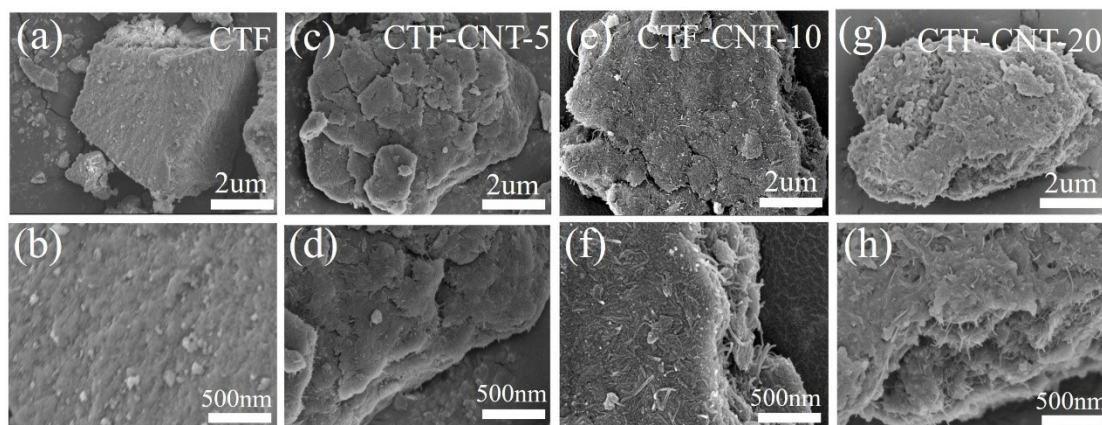

1

2

3 **Figure S1.** SEM images of (a, b) CTF; (c, d) CTF-CNT-5; (e, f) CTF-CNT-10; and (g, h)

4 CTF-CNT-20, illustrating their respective morphologies and structural features.

5

6



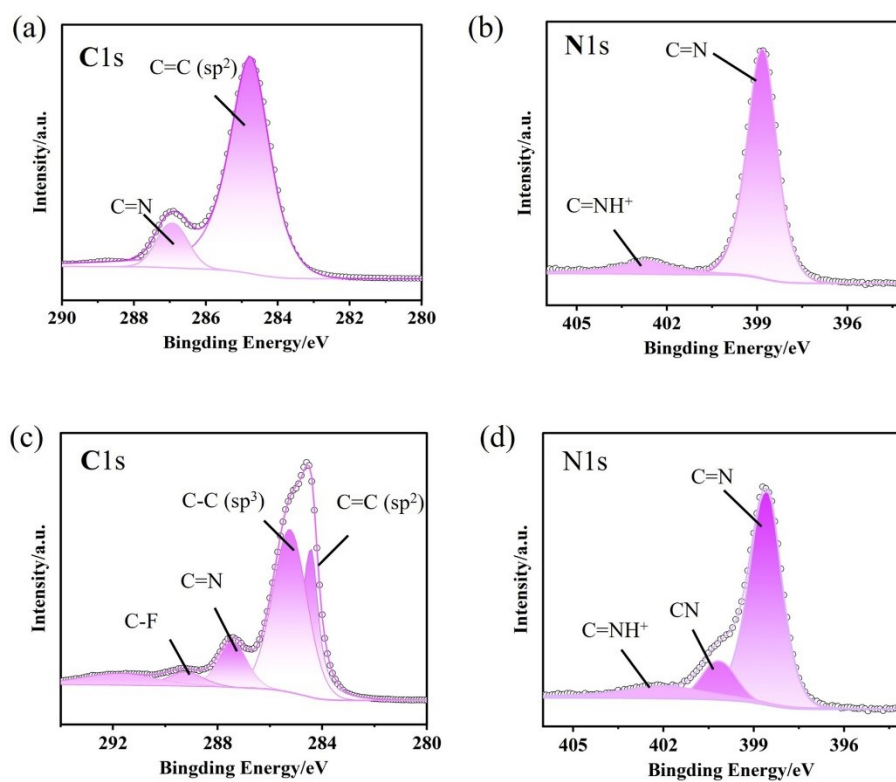

1  
2 **Figure S2.** (a, b) C 1s and N 1s XPS spectra of CTF;(c, d) C 1s and N 1s XPS spectra of  
3 CTF-CNT.

4



1

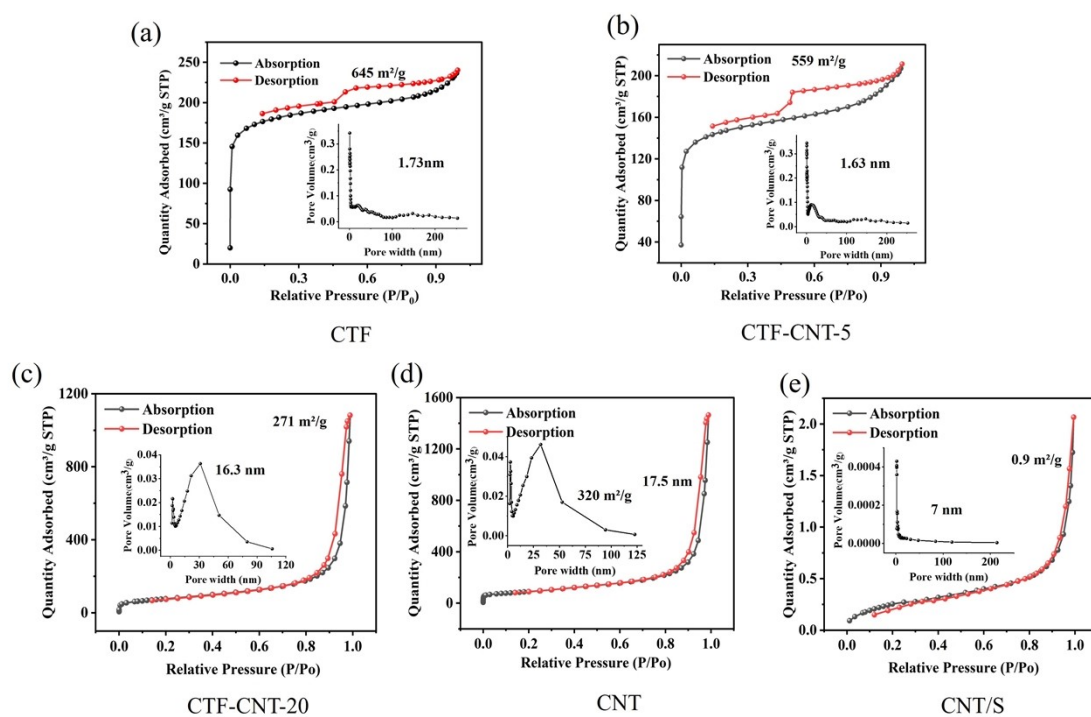

2

3 **Figure S3.** Surface area and pore size analysis of the materials:(a) CTF;(b) CTF-CNT-5;(c)

4 CTF-CNT-20;(d) CNT;(e) CTF/S.

5

6



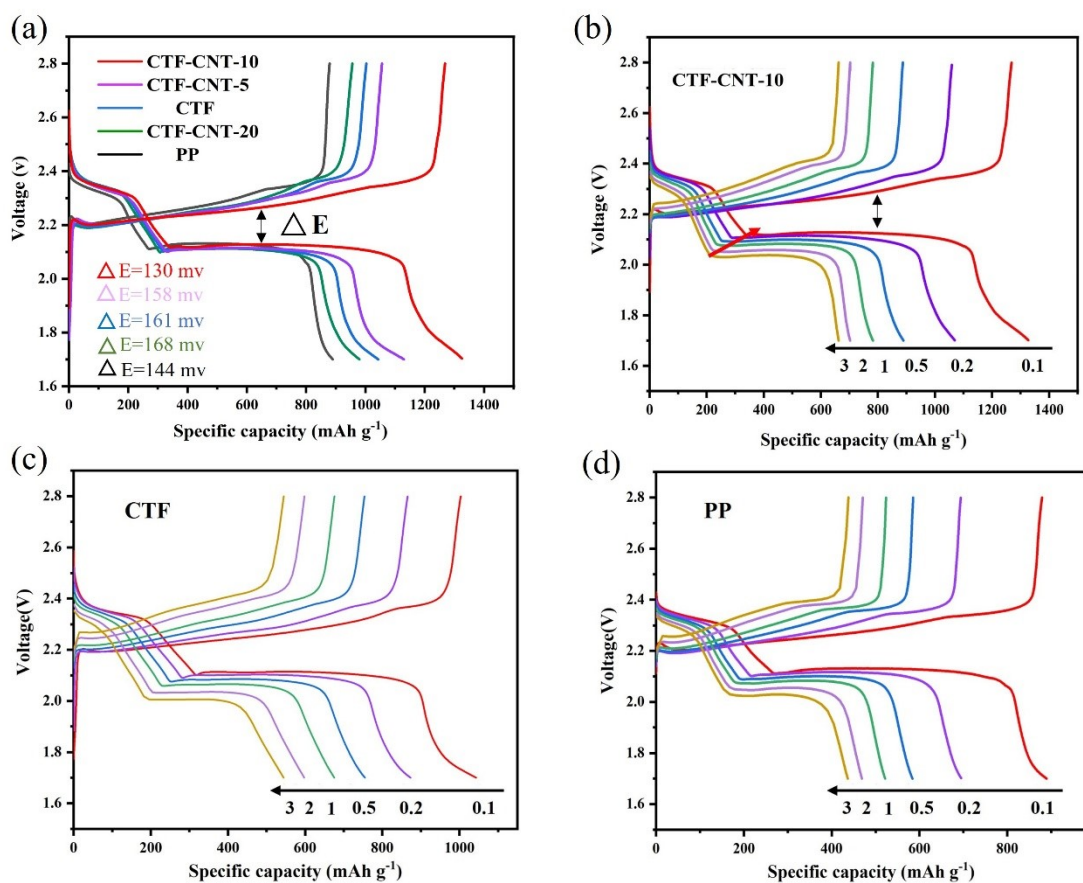

1

2 **Figure S4.** (a) Rate performance of CTF, CTF-CNT-10, CTF-CNT-5, CTF-CNT-20, and

3 unmodified PP separators. (b) Voltage vs. specific capacity curve of CTF-CNT-10

4 separator.(c) Voltage vs. specific capacity curve of CTF separator.(d) Voltage vs. specific

5 capacity curve of PP separator.

6

7



1

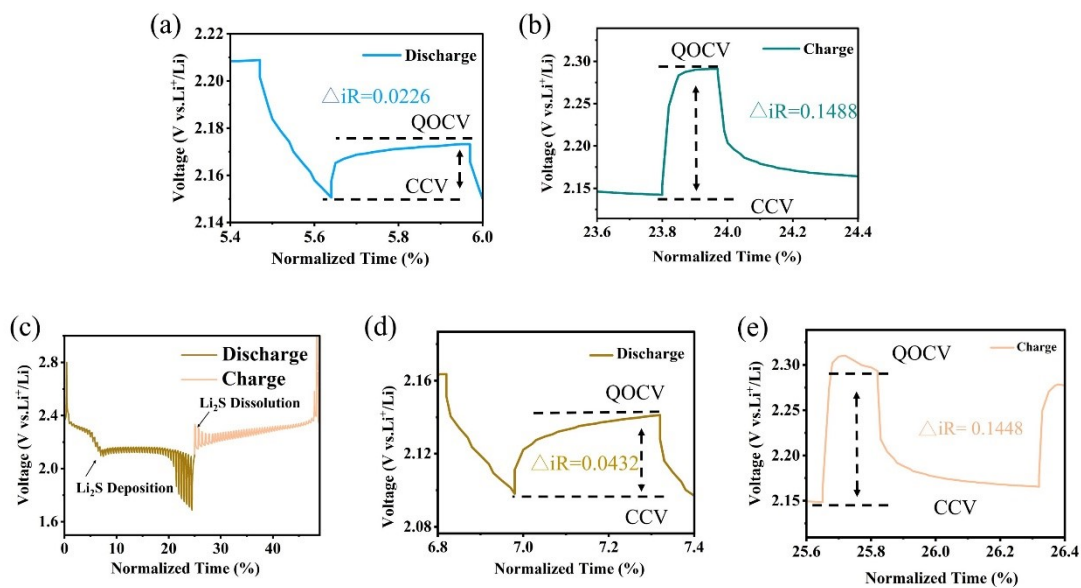

2

3 **Figure S5.** (a) GITT curve during  $\text{Li}_2\text{S}$  nucleation.(b) GITT curve during  
 4  $\text{Li}_2\text{S}$ decomposition.(c) GITT curve of CTF separator.(d) GITT curve during  $\text{Li}_2\text{S}$   
 5 nucleation.(e) GITT curve during  $\text{Li}_2\text{S}$  decomposition.

6

7



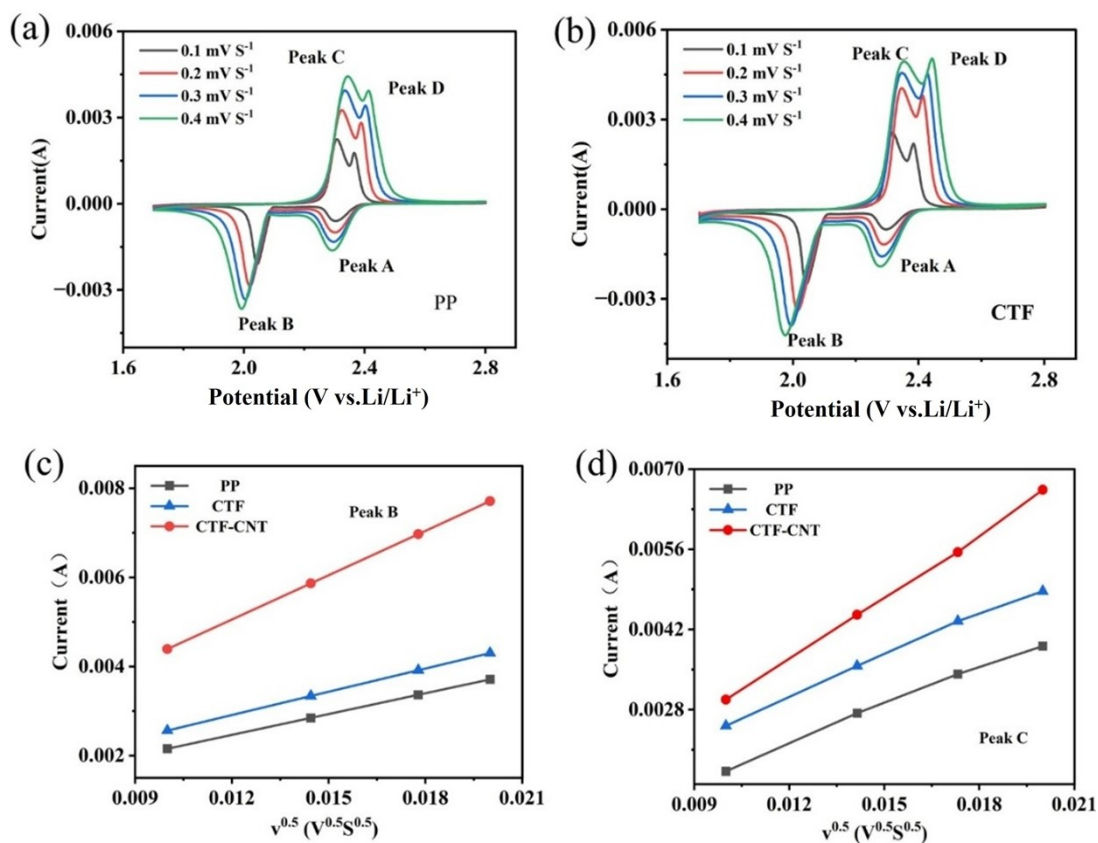

1

2 **Figure S6.** (a,b) CV curves of PP and CTF separators at scan rates of 0.1, 0.2, 0.3, and 0.4

3 mV s<sup>-1</sup>. (c,d) Relationship between peak current and square root of scan rate for CTF-CNT,

4 CTF, and PP separators at different scan rates.

5



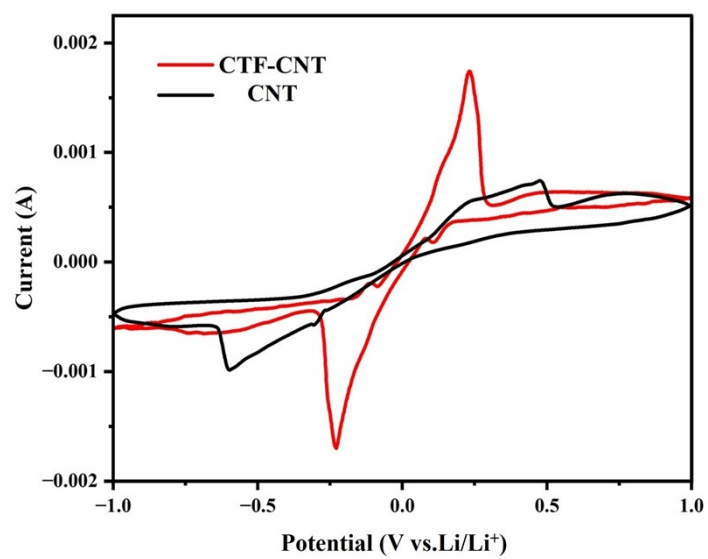

1

2 **Figure S7.**CV tests of CTF-CNT and CNT electrode at a scan rate of 0.1 mV s<sup>-1</sup>, with a  
3 voltage range of -1 V to 1 V.

4



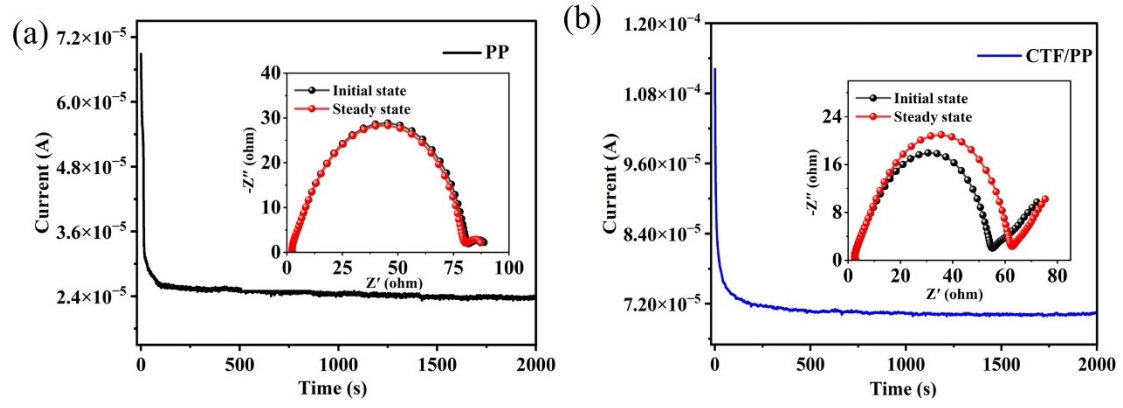

1  
2 **Figure S8.** (a) Constant potential discharge curve of PP separator at a voltage of 10 mV.(b)  
3 Constant potential discharge curve of CTF separator at a voltage of 10 mV.

4



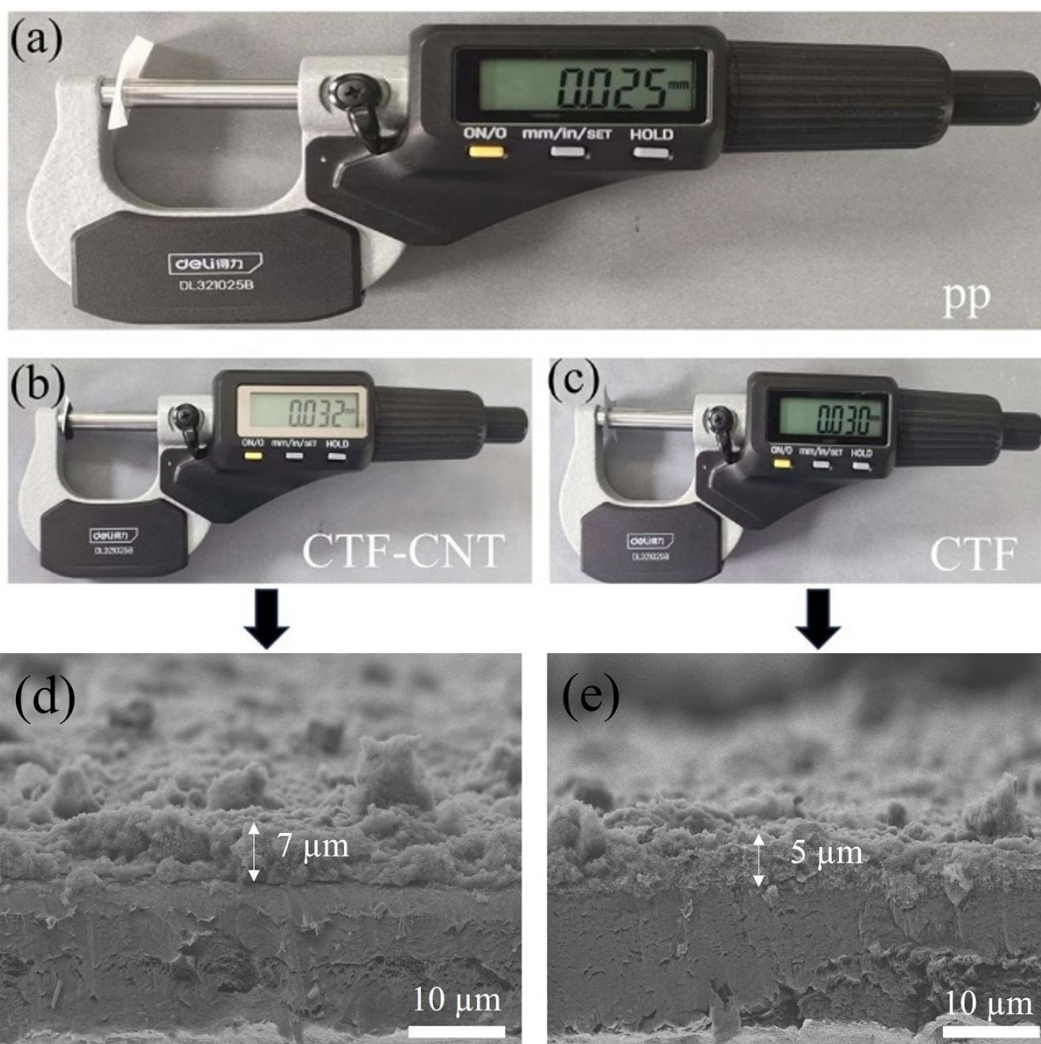

1  
2

3 **Figure S9.**(a) Schematic of the thousandth measurement results for PP separator.(b) Schematic of  
4 the thousandth measurement results for CTF-CNT separator.(c) Schematic of the thousandth  
5 measurement results for CTF separator.(d) Cross-sectional schematic of the CTF-CNT  
6 separator.(e) Cross-sectional schematic of the CTF separator.



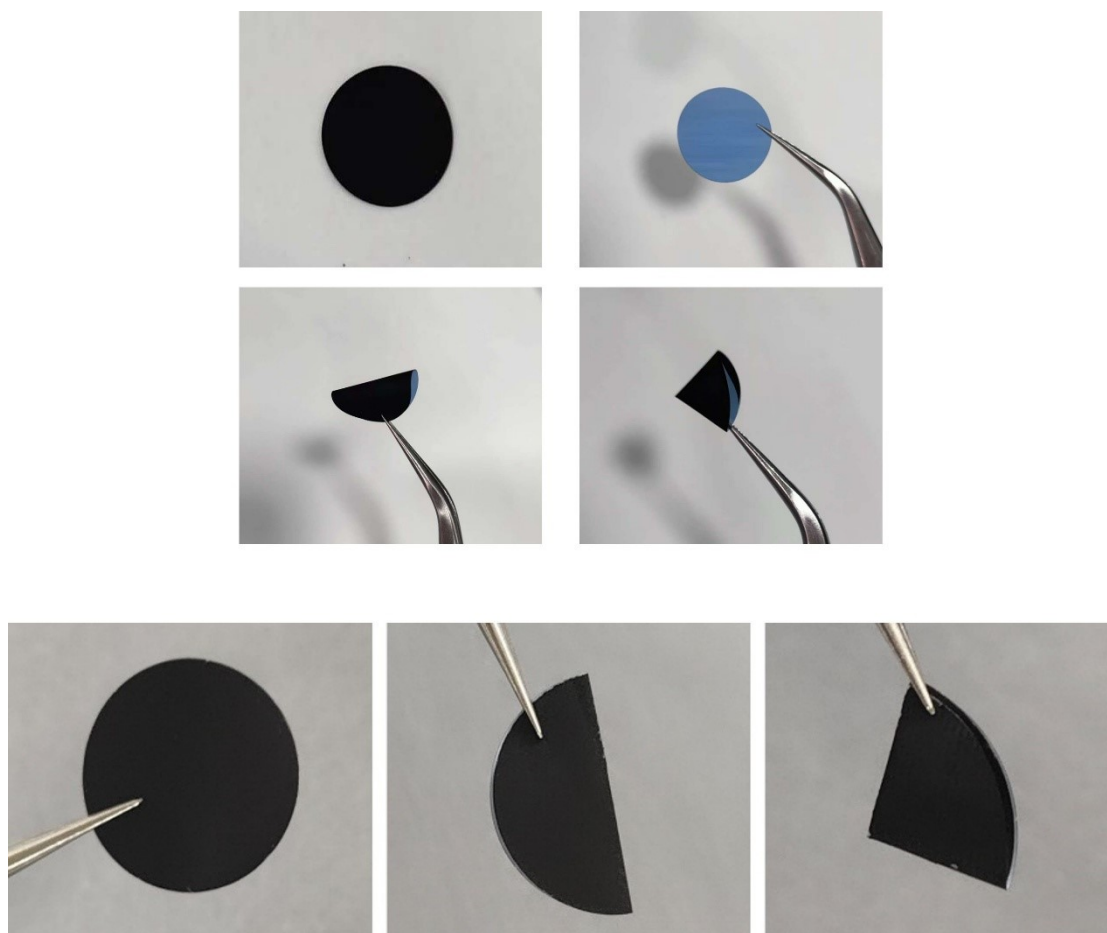

**Figure S10.** Photographic image showing the vacuum filtration process of CTF-CNT composite onto the separator.



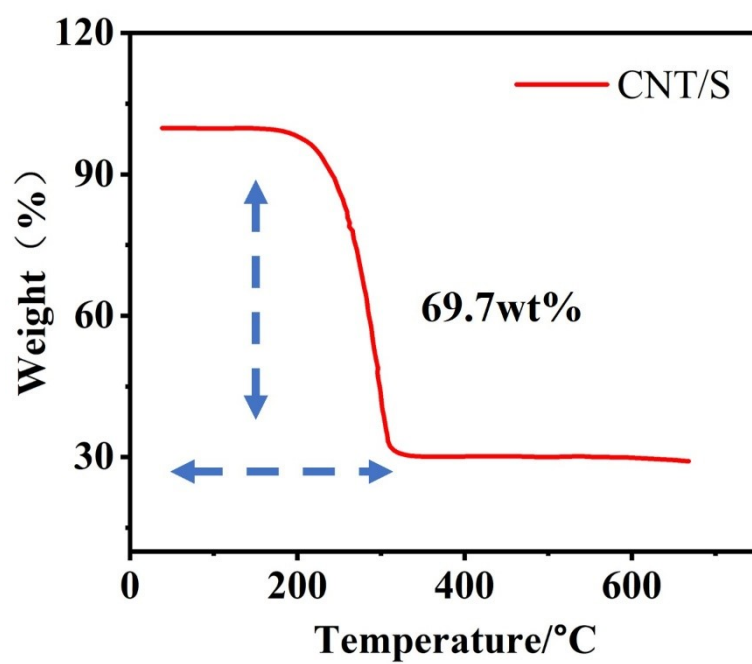

**Figure S11.** Thermogravimetric analysis (TGA) curve of the CNT/S composite cathode material, showing the sulfur content to be approximately 69.7 wt%.
